# Supplementary material
Source: PubMed Central journal article supplement (PMC3436140)
Supplement: supp_M111.338012_Pahan-Revalesio-JBC-2012-Supplemental-re-re-revised.pdf [file supp_M111.338012_Pahan-Revalesio-JBC-2012-Supplemental-re-re-revised.pdf]

# **Suppression of nuclear factor-kappa B activation and inflammation in microglia by a physically-modified saline**

**Saurabh Khasnavis<sup>1</sup>, Arundhati Jana<sup>1</sup>, Avik Roy<sup>1</sup>, Tony Wood<sup>2</sup>, Supurna Ghosh<sup>2</sup>, Richard Watson<sup>2</sup>, and Kalipada Pahan<sup>1</sup>**

<sup>1</sup>Department of Neurological Sciences, Rush University Medical Center, Chicago, IL 60612;

<sup>2</sup>Revalerio Corporation, 1200 East D Street, Tacoma, WA 98421

To whom correspondence should be addressed:

Kalipada Pahan, Ph.D.

Department of Neurological Sciences, Rush University Medical Center

1735 West Harrison St, Suite 320, Chicago, IL 60612

Telephone (312) 563-3592; Fax (312) 563-3571; Email: [Kalipada\\_Pahan@rush.edu](mailto:Kalipada_Pahan@rush.edu)

## **Legends to supplementary figures**

Supplementary Figure 1. **Mass spectrometric analyses of NS, PNS60 and RNS60.** To examine compositional differences in NS, PNS60 and RNS60, the LC-Q-TOF system was configured with an electrospray ionization interface (ESI) and the analysis was performed in both positive and negative modes. To facilitate visual comparison, the 100 to 1000  $m/z$  scan range for each sample was separated into 9 segments of 100  $m/z$  each and printed as part of the study data. The extracted segments from each of PNS60 and RNS60 were compared to the corresponding extracted segments for NS. Only a part of it is shown (A, solvent; B, NS; C, PNS60; D, RNS60).

Supplementary Figure 2. **Effect of isoform-selective PI-3 kinase inhibitors on RNS60-mediated upregulation of I $\kappa$ B $\alpha$  in mouse microglial cells.** Mouse BV-2 microglial cells preincubated with different concentrations of GDC-0941 (A&B), TGX-221 (C&D), IC-87114 (E&F), and AS-605240 (G&H) for 30 min were treated with RNS60 (10% v/v) under serum-free condition. After 1 h of treatment, the level of I $\kappa$ B $\alpha$  was monitored by Western blot (A, C, E, & G). Bands were scanned and results presented as protein expression relative to Actin (B, D, F, &H). Results represent mean  $\pm$

SD of three separate experiments. <sup>a</sup>*p* < 0.001 vs control; <sup>b</sup>*p* < 0.001 vs RNS60; ns, non-significant.

Supplementary Figure 3. **Effect of siRNA knockdown of p110 $\alpha$  and p110 $\delta$  isoforms of PI-3 kinase on RNS60-mediated upregulation of I $\kappa$ B $\alpha$  in mouse microglial cells.** Mouse BV-2 microglial cells were transfected with control siRNA, p110 $\alpha$  siRNA or p110 $\delta$  siRNA (Santa Cruz, CA). After 48 h of transfection, the knockdown of p110 $\alpha$  and p110 $\delta$  was monitored by Western blot (A). After 48 h, cells were stimulated with RNS60 for 1 h followed by monitoring the level of I $\kappa$ B $\alpha$  by Western blot (B). Bands were scanned and results presented as protein expression relative to Actin (C). Results represent mean  $\pm$  SD of three separate experiments. <sup>a</sup>*p* < 0.001 vs control; <sup>b</sup>*p* < 0.001 vs cont siRNA-RNS60.

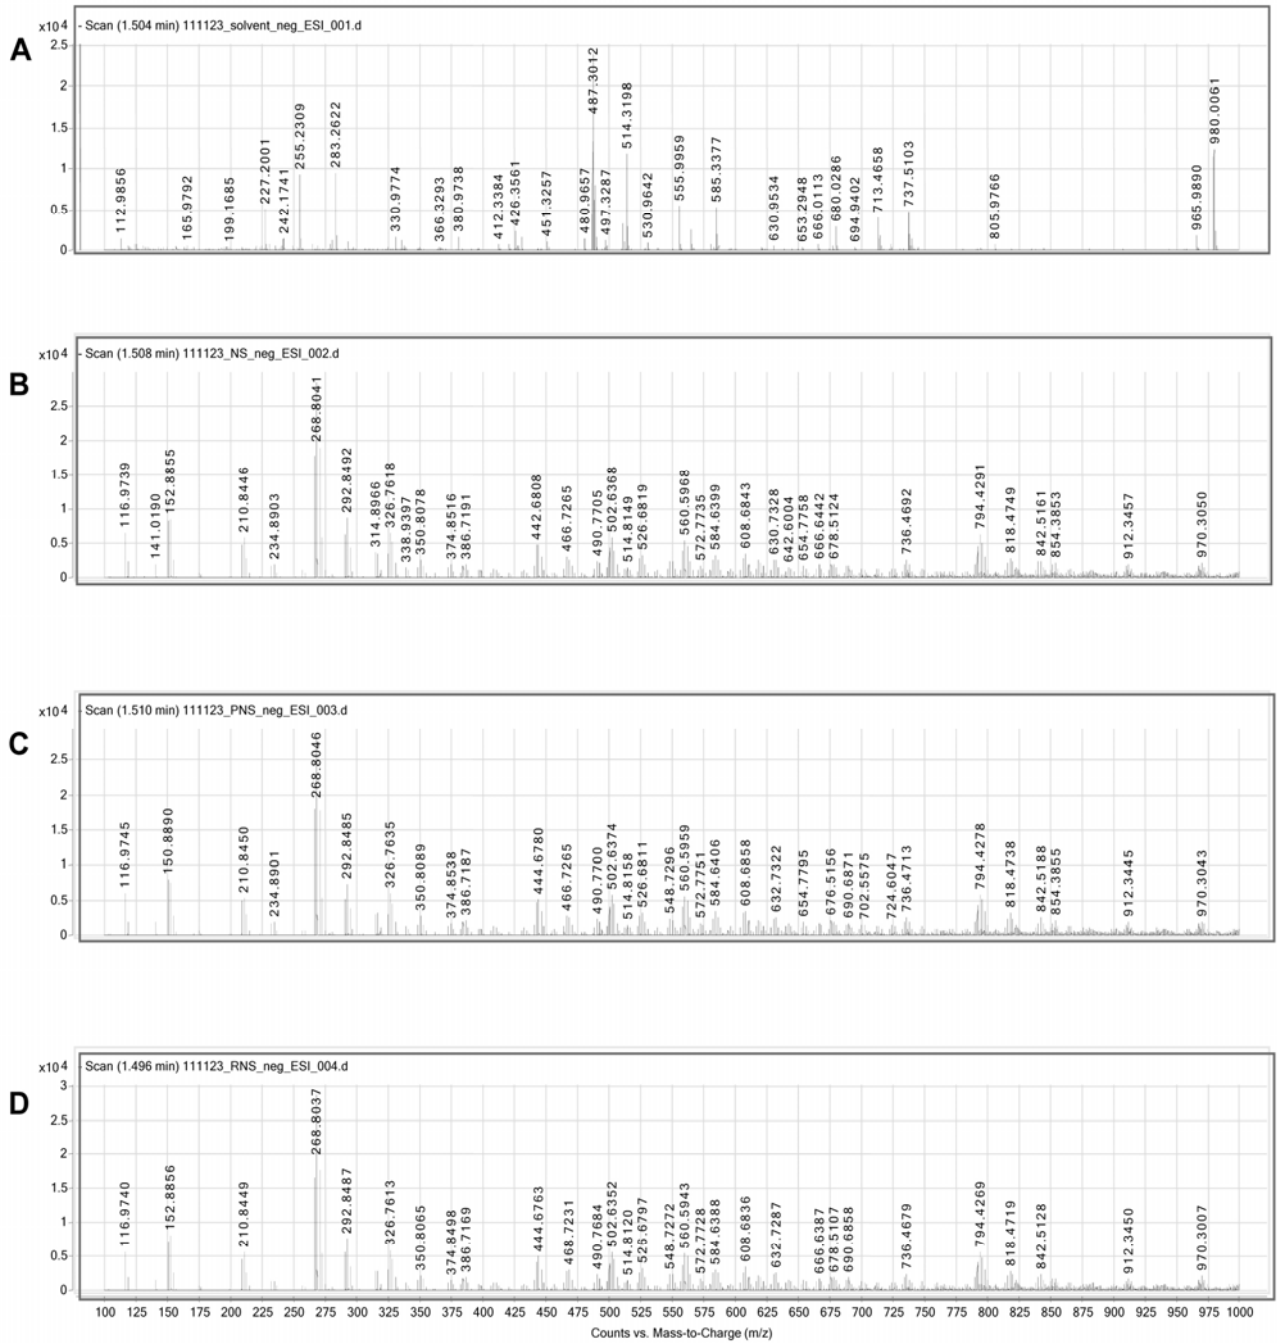

**Supplementary Fig. 1**

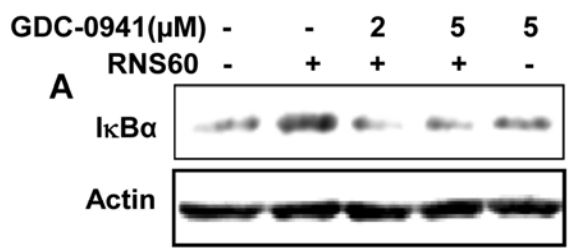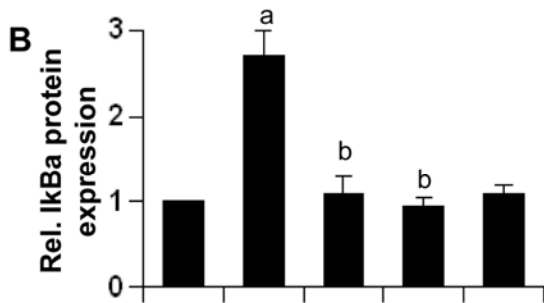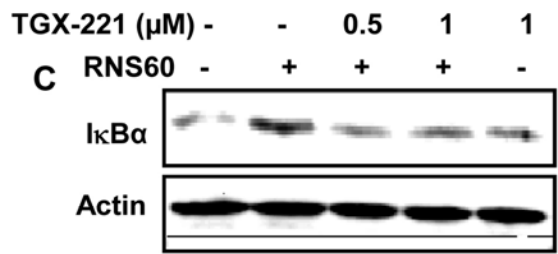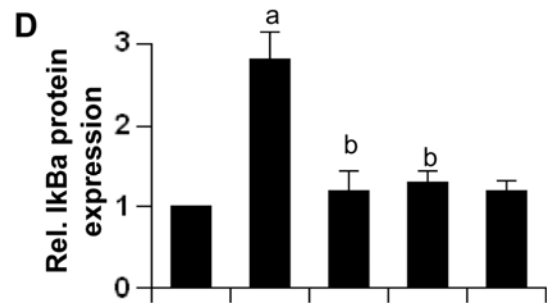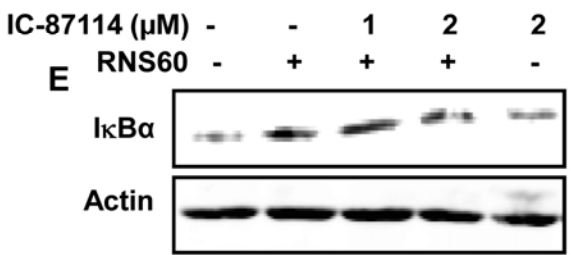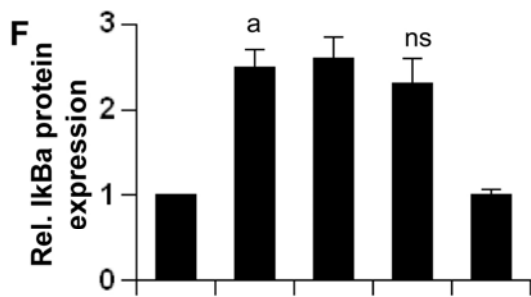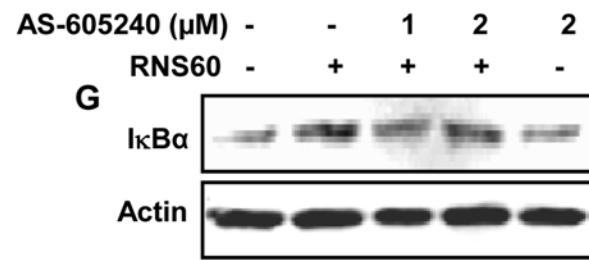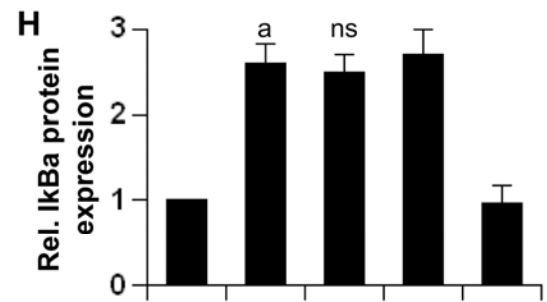

**Supplementary Figure 2**

|                      |   |   |   |   |   |   |
|----------------------|---|---|---|---|---|---|
| Control SiRNA        | + | + | - | - | - | - |
| p110- $\delta$ SiRNA | - | - | - | - | + | + |
| p110- $\alpha$ SiRNA | - | - | + | + | - | - |

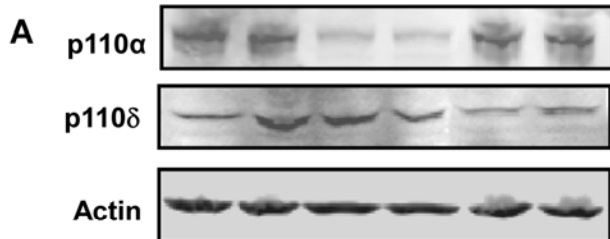

|                      |   |   |   |   |   |   |
|----------------------|---|---|---|---|---|---|
| Cont SiRNA           | - | - | - | - | + | + |
| p110- $\delta$ SiRNA | - | - | + | + | - | - |
| p110- $\alpha$ SiRNA | + | + | - | - | - | - |
| RNS60                | - | + | - | + | - | + |

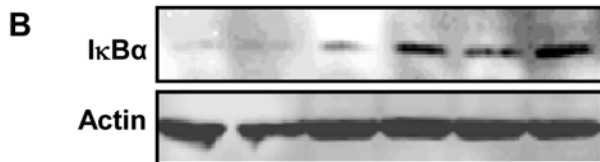

|                      |   |   |   |   |   |   |
|----------------------|---|---|---|---|---|---|
| Cont SiRNA           | + | + | - | - | - | - |
| p110- $\delta$ SiRNA | - | - | - | - | + | + |
| p110- $\alpha$ SiRNA | - | - | + | + | - | - |
| RNS60                | - | + | - | + | - | + |

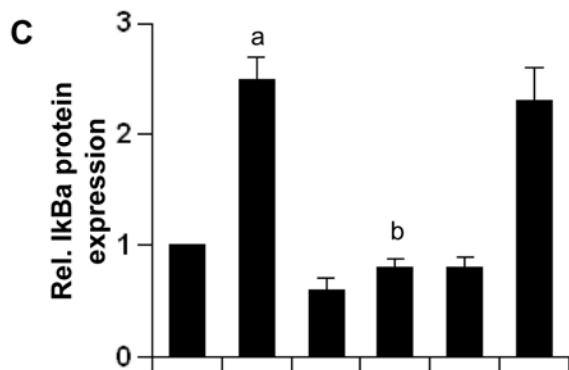

**Supplementary Figure 3**

## Supplementary Table 1

**Table 1**

| Test Material                | Ba <sup>d</sup> | Ni              | K                    | TOC |
|------------------------------|-----------------|-----------------|----------------------|-----|
| Bottled RNS60 <sup>a</sup>   | 0.0024 (0.0004) | 0.0059 (0.0008) | 0.6 (2)              | 35  |
| Bottled PNS60 <sup>a,b</sup> | 0.0028 (0.0004) | 0.0043 (0.0008) | 0.2 (2)              | 43  |
| Source saline <sup>c</sup>   | 0 (0.0004)      | 0.0045 (0.0008) | 0.6 (1) <sup>e</sup> | 21  |

### Table 1 Legend

ICP-MS results for the three tested metals (out of 26 total) that were above the minimal detection limits, presented as ppm (mg/L) above the detection limit (provided in parentheses). Total Organic Carbon (TOC) values are shown in ppb. <sup>a</sup>In glass bottles, <sup>b</sup>This saline contacted the same device surfaces as RNS60 and was bottled in the same way, <sup>c</sup>Supplied in polypropylene bottles, <sup>d</sup>Barium is known to leach from glass, <sup>e</sup>The smaller detection limit for control saline resulted from large analysis volumes.
